# Supplementary material for: Amino Acid-Metabolizing Enzymes in Advanced High-Grade Serous Ovarian Cancer Patients: Value of Ascites as Biomarker Source and Role for IL4I1 and IDO1
Source: MDPI journal article supplement (doi:10.3390/cancers15030893), 2023-01-31
Supplement: s1 [file s1]

**Amino acid-metabolizing enzymes in advanced high-grade serous ovarian cancer patients: value of ascites as biomarker source and role for IL4I1 and IDO1**

Yvonne Grobбен, Judith E. den Ouden, Cristina Aguado, Anne M. van Altena, Aletta D. Kraneveld and Guido J. R. Zaman

**Table S1.** List of analytes and isotope-labelled internal standards used for LC-MS/MS analysis.

| Analyte                     | Catalog Number | Supplier                   | Internal Standard                                         | Catalog Number | Supplier                       |
|-----------------------------|----------------|----------------------------|-----------------------------------------------------------|----------------|--------------------------------|
| L-Arginine-HCl              | 105000250      | Acros Organics             | L-Arginine-d7-HCl                                         | A769501        | Toronto Research Chemicals     |
| L-Ornithine-HCl             | 12.956.55      | Janssen                    | L-Ornithine-d6-HCl                                        | O695553        | Toronto Research Chemicals     |
| L-Citrulline                | C7629          | Sigma-Aldrich              | L-Citrulline-d7                                           | C535703        | Toronto Research Chemicals     |
| L-Glutamine                 | 49419          | Sigma-Aldrich              | L-Glutamine-d5                                            | G597005        | Toronto Research Chemicals     |
| L-Glutamic acid             | 49449          | Sigma-Aldrich              | L-Glutamic acid-d5                                        | G596963        | Toronto Research Chemicals     |
| L-Phenylalanine             | 78019          | Sigma-Aldrich              | L-Phenylalanine-d7                                        | P319416        | Toronto Research Chemicals     |
| L-Tryptophan                | T0254          | Sigma-Aldrich              | L-Tryptophan-d5                                           | T947212        | Toronto Research Chemicals     |
| L-Tyrosine                  | T899975        | Toronto Research Chemicals | L-Tyrosine-d2                                             | H899977        | Toronto Research Chemicals     |
| L-Kynurenine                | BIB6088        | Apollo Scientific          | L-Kynurenine-d4                                           | K-008005       | TLC Pharmaceutical Standards   |
| Kynurenic acid              | K660500        | Toronto Research Chemicals | Kynurenic acid-d5                                         | K660502        | Toronto Research Chemicals     |
| DL-Indole-3-lactic acid     | I627100        | Toronto Research Chemicals | DL-Indole-3-lactic acid-d5                                | I627102        | Toronto Research Chemicals     |
| Indole-3-acetic acid        | I577344        | Toronto Research Chemicals | Indole-3-acetic acid-d5                                   | I577344        | Toronto Research Chemicals     |
| Indole-3-aldehyde           | 129445         | Sigma-Aldrich              | Indole-3-aldehyde- <sup>13</sup> C <sub>8</sub>           | I614993        | Toronto Research Chemicals     |
| 4-Hydroxyphenylpyruvic acid | 114286         | Sigma-Aldrich              | 4-Hydroxyphenylpyruvic acid- <sup>13</sup> C <sub>9</sub> | 07491          | Sigma-Aldrich                  |
| Phenylpyruvic acid          | 286958         | Sigma-Aldrich              | Phenylpyruvic acid- <sup>13</sup> C <sub>9</sub>          | CLM-10604      | Cambridge Isotope Laboratories |

**Table S2.** Retention times and MRM transitions used for analyte and internal standard detection by LC-MS/MS.

| Analyte                     | Separation Method | Ionization Mode | RT (min) | MRM-Transition (m/z) | Internal Standard                                         | MRM-Transition (m/z) |
|-----------------------------|-------------------|-----------------|----------|----------------------|-----------------------------------------------------------|----------------------|
| L-Arginine                  | HILIC             | Positive        | 7.2      | 175.2 → 70.1         | L-Arginine-d7                                             | 182.2 → 77.1         |
| L-Ornithine                 | HILIC             | Positive        | 7.4      | 133.1 → 70.2         | L-Ornithine-d6                                            | 139.0 → 76.2         |
| L-Citrulline                | HILIC             | Positive        | 4.9      | 176.1 → 70.0         | L-Citrulline-d7                                           | 183.2 → 77.2         |
| L-Glutamine                 | HILIC             | Positive        | 4.2      | 147.2 → 83.9         | L-Glutamine-d5                                            | 152.1 → 89.1         |
| L-Glutamic acid             | HILIC             | Positive        | 3.6      | 148.1 → 84.1         | L-Glutamic acid-d5                                        | 153.1 → 87.9         |
| L-Phenylalanine             | HILIC             | Positive        | 1.6      | 166.2 → 102.9        | L-Phenylalanine-d7                                        | 172.9 → 108.1        |
| L-Tryptophan                | HILIC             | Positive        | 1.6      | 205.0 → 118.2        | L-Tryptophan-d5                                           | 209.9 → 122.1        |
| L-Tyrosine                  | HILIC             | Positive        | 2.2      | 182.1 → 91.0         | L-Tyrosine-d2                                             | 184.0 → 92.0         |
| L-Kynurenine                | RPLC-1            | Positive        | 0.8      | 208.8 → 94.1         | L-Kynurenine-d4                                           | 213.1 → 97.9         |
| Kynurenic acid              | RPLC-1            | Positive        | 1.0      | 190.0 → 162.1        | Kynurenic acid-d5                                         | 194.9 → 167.1        |
| DL-Indole-3-lactic acid     | RPLC-1            | Positive        | 1.7      | 206.0 → 118.2        | DL-Indole-3-lactic acid-d5                                | 211.1 → 122.0        |
| Indole-3-acetic acid        | RPLC-1            | Positive        | 2.2      | 176.1 → 103.1        | Indole-3-acetic acid-d5                                   | 181.2 → 107.0        |
| Indole-3-aldehyde           | RPLC-2            | Negative        | 1.6      | 144.0 → 114.9        | Indole-3-aldehyde- <sup>13</sup> C <sub>8</sub>           | 152.0 → 123.1        |
| 4-Hydroxyphenylpyruvic acid | RPLC-3            | Negative        | 1.3      | 178.9 → 107.0        | 4-Hydroxyphenylpyruvic acid- <sup>13</sup> C <sub>9</sub> | 188.0 → 114.1        |
| Phenylpyruvic acid          | RPLC-3            | Negative        | 2.5      | 162.9 → 91.0         | Phenylpyruvic acid- <sup>13</sup> C <sub>9</sub>          | 172.0 → 98.0         |

HILIC: hydrophilic interaction liquid chromatography; MRM: multiple reaction monitoring; m/z: mass-to-charge ratio; RPLC: reversed-phase liquid chromatography; RT: retention time.

**Table S3.** Amino acid, metabolite and IL4I1 concentrations in healthy donor and high-grade serous ovarian cancer patient samples. Amino acid and metabolite concentrations were determined by LC-MS/MS analysis. IL4I1 concentrations were determined by ELISA. Concentrations indicated in grey *italics* are deleteriously influenced by sample processing conditions.

|        | Arg (μM) |        |         | Orn (μM) |        |         | Cit (μM) |        |         | Gln (μM) |        |         | Glu (μM) |        |         |
|--------|----------|--------|---------|----------|--------|---------|----------|--------|---------|----------|--------|---------|----------|--------|---------|
|        | Plasma   | Plasma | Ascites |
|        | HD       | OC     | OC      |
| Pt. 1  |          | 66.8   |         |          | 189    |         |          | 29.7   |         |          | 578    |         |          | 207    |         |
| Pt. 2  |          | 29.2   |         |          | 106    |         |          | 25.8   |         |          | 469    |         |          | 132    |         |
| Pt. 3  |          | 32.0   | 81.0    |          | 67.9   | 52.5    |          | 26.1   | 25.9    |          | 535    | 693     |          | 168    | 38.7    |
| Pt. 4  |          | 22.3   | 79.8    |          | 207    | 43.3    |          | 46.5   | 22.5    |          | 576    | 640     |          | 208    | 83.4    |
| Pt. 5  |          | 35.9   | 138     |          | 120    | 129     |          | 33.0   | 44.9    |          | 463    | 786     |          | 85.8   | 60.6    |
| Pt. 6  |          | 28.2   | 141     |          | 135    | 104     |          | 22.5   | 28.0    |          | 406    | 613     |          | 200    | 91.3    |
| Pt. 7  |          | 14.2   | 148     |          | 147    | 51.8    |          | 29.7   | 25.7    |          | 478    | 928     |          | 107    | 67.9    |
| Pt. 8  |          | 19.7   | 63.2    |          | 166    | 51.5    |          | 23.6   | 18.4    |          | 407    | 507     |          | 232    | 33.1    |
| Pt. 9  |          | 65.2   | 82.2    |          | 103    | 38.0    |          | 30.6   | 20.3    |          | 708    | 497     |          | 103    | 55.9    |
| Pt. 10 |          | 21.9   | 49.1    |          | 127    | 98.5    |          | 20.3   | 24.2    |          | 425    | 466     |          | 195    | 224     |
| Pt. 11 |          | 9.70   | 44.1    |          | 120    | 65.1    |          | 22.0   | 14.6    |          | 545    | 177     |          | 187    | 353     |
| Pt. 12 |          | 26.9   | 32.3    |          | 152    | 112     |          | 24.5   | 21.0    |          | 473    | 401     |          | 305    | 545     |
| Pt. 13 |          | 17.9   | 69.0    |          | 141    | 52.9    |          | 17.7   | 18.5    |          | 342    | 434     |          | 197    | 71.6    |
| Pt. 14 |          | 19.4   | 96.3    |          | 160    | 54.2    |          | 26.3   | 13.1    |          | 524    | 569     |          | 199    | 68.2    |
| Pt. 15 |          | 39.6   | 69.3    |          | 129    | 83.7    |          | 24.9   | 25.2    |          | 405    | 504     |          | 301    | 192     |
| Pt. 16 |          | 9.02   | 70.1    |          | 109    | 48.8    |          | 16.7   | 16.9    |          | 397    | 479     |          | 202    | 282     |
| Pt. 17 |          | 35.5   | 88.1    |          | 151    | 42.5    |          | 22.8   | 18.2    |          | 596    | 589     |          | 290    | 67.1    |
| Pt. 18 |          | 26.8   | 91.9    |          | 197    | 59.0    |          | 32.2   | 18.2    |          | 467    | 537     |          | 213    | 46.1    |
| Pt. 19 |          | 47.4   | 163     |          | 106    | 57.9    |          | 16.0   | 24.5    |          | 458    | 778     |          | 127    | 115     |
| Pt. 20 |          | 22.9   | 122     |          | 175    | 54.9    |          | 31.1   | 28.5    |          | 399    | 519     |          | 155    | 83.2    |
| Pt. 21 |          | 22.4   | 61.5    |          | 133    | 52.2    |          | 15.0   | 12.4    |          | 626    | 631     |          | 186    | 60.4    |
| Pt. 22 |          | 39.2   | 105     |          | 162    | 69.0    |          | 19.5   | 17.9    |          | 415    | 528     |          | 208    | 93.4    |
| Pt. 23 |          | 16.4   | 98.4    |          | 129    | 93.2    |          | 12.3   | 22.1    |          | 496    | 655     |          | 140    | 314     |
| Pt. 24 |          | 27.9   | 101     |          | 136    | 59.9    |          | 21.1   | 21.8    |          | 418    | 540     |          | 208    | 160     |
| Pt. 25 |          |        | 107     |          |        | 83.5    |          |        | 22.1    |          |        | 801     |          |        | 144     |
| Pt. 26 |          |        | 108     |          |        | 49.6    |          |        | 23.6    |          |        | 671     |          |        | 95.6    |
| Pt. 27 |          |        | 129     |          |        | 65.3    |          |        | 24.7    |          |        | 721     |          |        | 133     |
| Pt. 28 |          |        | 144     |          |        | 40.6    |          |        | 22.0    |          |        | 762     |          |        | 119     |
| Pt. 29 |          |        | 127     |          |        | 64.3    |          |        | 25.0    |          |        | 652     |          |        | 87.1    |
| Pt. 30 |          |        | 166     |          |        | 81.1    |          |        | 30.0    |          |        | 691     |          |        | 289     |
| Pt. 31 |          |        | 99.3    |          |        | 57.8    |          |        | 22.8    |          |        | 612     |          |        | 99.0    |
| Pt. 32 |          |        | 118     |          |        | 70.4    |          |        | 32.2    |          |        | 658     |          |        | 105     |
| Pt. 33 |          |        | 132     |          |        | 80.9    |          |        | 14.9    |          |        | 761     |          |        | 67.2    |
| Pt. 34 |          |        | 139     |          |        | 63.3    |          |        | 29.4    |          |        | 570     |          |        | 150     |
| HD 1   | 69.6     |        |         | 93.1     |        |         | 20.8     |        |         | 487      |        |         | 47.8     |        |         |
| HD 2   | 85.5     |        |         | 130      |        |         | 49.8     |        |         | 513      |        |         | 103      |        |         |
| HD 3   | 76.5     |        |         | 114      |        |         | 30.6     |        |         | 543      |        |         | 85.4     |        |         |
| HD 4   | 40.7     |        |         | 139      |        |         | 27.4     |        |         | 443      |        |         | 64.3     |        |         |
| HD 5   | 113      |        |         | 85.3     |        |         | 24.1     |        |         | 613      |        |         | 87.8     |        |         |
| HD 6   | 80.7     |        |         | 127      |        |         | 43.5     |        |         | 596      |        |         | 85.8     |        |         |
| HD 7   | 101      |        |         | 155      |        |         | 20.9     |        |         | 411      |        |         | 268      |        |         |
| HD 8   | 65.2     |        |         | 177      |        |         | 37.1     |        |         | 640      |        |         | 83.0     |        |         |
| HD 9   | 79.0     |        |         | 109      |        |         | 29.6     |        |         | 455      |        |         | 121      |        |         |
| HD 10  | 64.9     |        |         | 84.4     |        |         | 41.1     |        |         | 562      |        |         | 49.6     |        |         |
| HD 11  | 67.7     |        |         | 94.3     |        |         | 24.3     |        |         | 687      |        |         | 29.2     |        |         |
| HD 12  | 36.0     |        |         | 135      |        |         | 38.7     |        |         | 526      |        |         | 66.5     |        |         |
| HD 13  | 37.3     |        |         | 118      |        |         | 23.9     |        |         | 495      |        |         | 81.0     |        |         |
| HD 14  | 54.8     |        |         | 144      |        |         | 30.8     |        |         | 541      |        |         | 77.9     |        |         |
| HD 15  | 58.2     |        |         | 179      |        |         | 41.1     |        |         | 651      |        |         | 96.9     |        |         |
| HD 16  | 112      |        |         | 140      |        |         | 31.8     |        |         | 573      |        |         | 48.4     |        |         |
| HD 17  | 49.6     |        |         | 99.5     |        |         | 35.2     |        |         | 581      |        |         | 110      |        |         |
| HD 18  | 49.5     |        |         | 96.9     |        |         | 28.1     |        |         | 442      |        |         | 111      |        |         |
| HD 19  | 73.0     |        |         | 169      |        |         | 40.3     |        |         | 616      |        |         | 68.1     |        |         |
| HD 20  | 61.9     |        |         | 61.5     |        |         | 28.6     |        |         | 459      |        |         | 66.2     |        |         |
| HD 21  | 79.3     |        |         | 108      |        |         | 40.5     |        |         | 556      |        |         | 106      |        |         |
| HD 22  | 90.7     |        |         | 123      |        |         | 27.7     |        |         | 564      |        |         | 83.6     |        |         |
| HD 23  | 58.8     |        |         | 137      |        |         | 36.0     |        |         | 660      |        |         | 70.9     |        |         |
| HD 24  | 73.6     |        |         | 116      |        |         | 26.1     |        |         | 446      |        |         | 68.2     |        |         |
| HD 25  | 74.2     |        |         | 123      |        |         | 38.4     |        |         | 629      |        |         | 116      |        |         |
| HD 26  | 53.5     |        |         | 149      |        |         | 41.6     |        |         | 653      |        |         | 82.3     |        |         |
| HD 27  | 87.7     |        |         | 334      |        |         | 52.0     |        |         | 558      |        |         | 68.2     |        |         |
| HD 28  | 70.2     |        |         | 116      |        |         | 32.5     |        |         | 588      |        |         | 46.9     |        |         |
| HD 29  | 76.3     |        |         | 140      |        |         | 45.0     |        |         | 487      |        |         | 98.0     |        |         |
| HD 30  | 76.7     |        |         | 158      |        |         | 29.2     |        |         | 570      |        |         | 60.9     |        |         |

Arg: L-arginine; Cit: L-citrulline; Gln: L-glutamine; Glu: L-glutamic acid; HD: healthy donor; OC: ovarian cancer patient; Orn: L-ornithine; Pt.: patient.

Table S3. *Cont.*

|        | Trp (μM) |        |         | Kyn (μM) |        |         | I3LA (nM) |        |         | I3AA (nM) |        |         | I3A (nM) |        |         | KynA (nM) |        |         |
|--------|----------|--------|---------|----------|--------|---------|-----------|--------|---------|-----------|--------|---------|----------|--------|---------|-----------|--------|---------|
|        | Plasma   | Plasma | Ascites | Plasma   | Plasma | Ascites | Plasma    | Plasma | Ascites | Plasma    | Plasma | Ascites | Plasma   | Plasma | Ascites | Plasma    | Plasma | Ascites |
|        | HD       | OC     | OC      | HD       | OC     | OC      | HD        | OC     | OC      | HD        | OC     | OC      | HD       | OC     | OC      | HD        | OC     | OC      |
| Pt. 1  |          | 41.1   |         |          | 2.32   |         |           | 503    |         |           | 1180   |         |          | 34.3   |         |           | 43.7   |         |
| Pt. 2  |          | 32.7   |         |          | 1.56   |         |           | 395    |         |           | 449    |         |          | 19.2   |         |           | 12.2   |         |
| Pt. 3  |          | 21.7   | 32.5    |          | 1.84   | 4.15    |           | 216    | 608     |           | 552    | 492     |          | 15.6   | 36.1    |           | 18.2   | 19.8    |
| Pt. 4  |          | 37.3   | 32.3    |          | 2.22   | 4.01    |           | 738    | 552     |           | 1900   | 582     |          | 19.4   | 19.6    |           | 40.1   | 22.5    |
| Pt. 5  |          | 29.6   | 58.8    |          | 1.32   | 4.21    |           | 267    | 1100    |           | 4130   | 3655    |          | 10.4   | 36.9    |           | 12.6   | 39.5    |
| Pt. 6  |          | 26.0   | 54.7    |          | 1.80   | 3.10    |           | 928    | 490     |           | 1295   | 1415    |          | 31.7   | 45.0    |           | 45.1   | 29.0    |
| Pt. 7  |          | 23.5   | 83.7    |          | 1.42   | 6.29    |           | 446    | 1445    |           | 1006   | 786     |          | 8.96   | 106     |           | 18.1   | 40.9    |
| Pt. 8  |          | 27.4   | 31.9    |          | 1.44   | 5.27    |           | 397    | 546     |           | 278    | 482     |          | 22.0   | 27.8    |           | 23.0   | 31.8    |
| Pt. 9  |          | 26.3   | 28.7    |          | 2.02   | 3.81    |           | 176    | 233     |           | 697    | 905     |          | 7.37   | 7.52    |           | 25.9   | 16.7    |
| Pt. 10 |          | 21.4   | 24.6    |          | 4.21   | 6.18    |           | 436    | 463     |           | 475    | 592     |          | 12.7   | 27.1    |           | 58.4   | 43.4    |
| Pt. 11 |          | 31.5   | 19.6    |          | 1.88   | 1.41    |           | 709    | 295     |           | 1815   | 1009    |          | 18.6   | 14.4    |           | 49.8   | 22.8    |
| Pt. 12 |          | 30.7   | 27.0    |          | 2.02   | 3.33    |           | 765    | 518     |           | 863    | 721     |          | 20.9   | 15.7    |           | 33.4   | 29.2    |
| Pt. 13 |          | 21.3   | 33.4    |          | 1.64   | 3.67    |           | 264    | 381     |           | 229    | 454     |          | 8.51   | 18.9    |           | 16.5   | 20.6    |
| Pt. 14 |          | 32.3   | 29.0    |          | 2.12   | 3.08    |           | 417    | 217     |           | 1072   | 687     |          | 20.7   | 16.5    |           | 23.5   | 25.0    |
| Pt. 15 |          | 49.9   | 35.6    |          | 2.46   | 5.15    |           | 950    | 1555    |           | 1410   | 899     |          | 32.7   | 52.8    |           | 14.3   | 26.8    |
| Pt. 16 |          | 24.1   | 37.9    |          | 1.39   | 3.69    |           | 461    | 705     |           | 559    | 781     |          | 10.9   | 36.7    |           | 39.4   | 35.5    |
| Pt. 17 |          | 22.1   | 31.0    |          | 2.20   | 2.98    |           | 250    | 223     |           | 978    | 705     |          | 9.01   | 9.41    |           | 16.1   | 12.5    |
| Pt. 18 |          | 34.6   | 35.7    |          | 2.64   | 4.58    |           | 1725   | 1220    |           | 3445   | 1590    |          | 46.2   | 114     |           | 52.0   | 45.5    |
| Pt. 19 |          | 52.6   | 73.7    |          | 3.72   | 8.27    |           | 639    | 941     |           | 1245   | 1450    |          | 32.2   | 43.5    |           | 27.5   | 52.8    |
| Pt. 20 |          | 23.9   | 41.4    |          | 2.35   | 6.48    |           | 729    | 1020    |           | 382    | 781     |          | 15.2   | 67.6    |           | 45.4   | 36.1    |
| Pt. 21 |          | 21.3   | 26.0    |          | 2.83   | 3.95    |           | 238    | 278     |           | 410    | 688     |          | 7.13   | 13.7    |           | 19.3   | 19.5    |
| Pt. 22 |          | 21.7   | 38.5    |          | 1.51   | 4.36    |           | 182    | 365     |           | 532    | 1410    |          | 8.77   | 29.0    |           | 32.4   | 27.5    |
| Pt. 23 |          | 26.6   | 31.8    |          | 1.13   | 2.67    |           | 318    | 423     |           | 772    | 698     |          | 16.3   | 21.5    |           | 20.0   | 37.7    |
| Pt. 24 |          | 21.0   | 35.1    |          | 2.39   | 12.5    |           | 564    | 1030    |           | 199    | 452     |          | 18.9   | 57.2    |           | 51.0   | 85.7    |
| Pt. 25 |          |        | 92.9    |          |        | 7.96    |           |        | 1355    |           |        | 855     |          |        | 46.7    |           |        | 41.0    |
| Pt. 26 |          |        | 34.7    |          |        | 3.96    |           |        | 686     |           |        | 1240    |          |        | 31.0    |           |        | 37.1    |
| Pt. 27 |          |        | 50.1    |          |        | 6.78    |           |        | 772     |           |        | 1290    |          |        | 37.5    |           |        | 37.0    |
| Pt. 28 |          |        | 55.4    |          |        | 3.30    |           |        | 700     |           |        | 690     |          |        | 42.3    |           |        | ND      |
| Pt. 29 |          |        | 46.0    |          |        | 5.04    |           |        | 363     |           |        | 1275    |          |        | 33.3    |           |        | 31.5    |
| Pt. 30 |          |        | 40.5    |          |        | 14.6    |           |        | 993     |           |        | 1023    |          |        | 66.7    |           |        | 128     |
| Pt. 31 |          |        | 55.7    |          |        | 3.79    |           |        | 825     |           |        | 1035    |          |        | 48.6    |           |        | 32.4    |
| Pt. 32 |          |        | 42.4    |          |        | 5.77    |           |        | 615     |           |        | 550     |          |        | 32.9    |           |        | 28.7    |
| Pt. 33 |          |        | 56.0    |          |        | 3.67    |           |        | 492     |           |        | 1525    |          |        | 53.9    |           |        | 22.6    |
| Pt. 34 |          |        | 48.8    |          |        | 6.19    |           |        | 348     |           |        | 1026    |          |        | 20.0    |           |        | 51.1    |
| HD 1   | 60.1     |        |         | 1.62     |        |         | 887       |        |         | 1625      |        |         | 50.6     |        |         | 51.6      |        |         |
| HD 2   | 50.9     |        |         | 1.58     |        |         | 703       |        |         | 2235      |        |         | 36.0     |        |         | 38.4      |        |         |
| HD 3   | 45.7     |        |         | 1.56     |        |         | 762       |        |         | 1090      |        |         | 28.4     |        |         | 53.4      |        |         |
| HD 4   | 61.8     |        |         | 1.21     |        |         | 614       |        |         | 1040      |        |         | 45.4     |        |         | 23.7      |        |         |
| HD 5   | 76.4     |        |         | 2.14     |        |         | 862       |        |         | 1615      |        |         | 95.3     |        |         | 52.0      |        |         |
| HD 6   | 61.7     |        |         | 1.42     |        |         | 644       |        |         | 1005      |        |         | 37.7     |        |         | 24.3      |        |         |
| HD 7   | 64.4     |        |         | 1.83     |        |         | 545       |        |         | 949       |        |         | 36.7     |        |         | 33.5      |        |         |
| HD 8   | 68.0     |        |         | 2.40     |        |         | 665       |        |         | 1995      |        |         | 44.0     |        |         | 50.0      |        |         |
| HD 9   | 67.9     |        |         | 1.82     |        |         | 755       |        |         | 909       |        |         | 47.6     |        |         | 32.3      |        |         |
| HD 10  | 56.0     |        |         | 1.36     |        |         | 764       |        |         | 1055      |        |         | 42.1     |        |         | 20.8      |        |         |
| HD 11  | 33.9     |        |         | 1.45     |        |         | 286       |        |         | 2585      |        |         | 20.6     |        |         | 20.5      |        |         |
| HD 12  | 61.0     |        |         | 1.70     |        |         | 691       |        |         | 1465      |        |         | 35.9     |        |         | 29.5      |        |         |
| HD 13  | 57.8     |        |         | 1.44     |        |         | 669       |        |         | 1790      |        |         | 48.3     |        |         | 22.4      |        |         |
| HD 14  | 45.0     |        |         | 1.88     |        |         | 581       |        |         | 2985      |        |         | 30.9     |        |         | 21.0      |        |         |
| HD 15  | 60.6     |        |         | 1.90     |        |         | 964       |        |         | 1210      |        |         | 43.4     |        |         | 111       |        |         |
| HD 16  | 71.0     |        |         | 2.14     |        |         | 639       |        |         | 2030      |        |         | 49.0     |        |         | 26.6      |        |         |
| HD 17  | 57.0     |        |         | 1.87     |        |         | 810       |        |         | 5045      |        |         | 53.2     |        |         | 27.3      |        |         |
| HD 18  | 73.1     |        |         | 2.61     |        |         | 718       |        |         | 1735      |        |         | 56.0     |        |         | 21.8      |        |         |
| HD 19  | 62.4     |        |         | 1.95     |        |         | 809       |        |         | 1225      |        |         | 48.6     |        |         | 63.2      |        |         |
| HD 20  | 58.2     |        |         | 1.59     |        |         | 740       |        |         | 896       |        |         | 44.0     |        |         | 33.2      |        |         |
| HD 21  | 71.3     |        |         | 1.87     |        |         | 908       |        |         | 2015      |        |         | 86.0     |        |         | 32.6      |        |         |
| HD 22  | 58.3     |        |         | 2.57     |        |         | 1100      |        |         | 644       |        |         | 33.1     |        |         | 49.6      |        |         |
| HD 23  | 59.9     |        |         | 2.08     |        |         | 697       |        |         | 1895      |        |         | 55.5     |        |         | 27.3      |        |         |
| HD 24  | 65.7     |        |         | 2.42     |        |         | 740       |        |         | 1280      |        |         | 49.0     |        |         | 26.5      |        |         |
| HD 25  | 64.0     |        |         | 1.51     |        |         | 514       |        |         | 993       |        |         | 42.9     |        |         | 34.3      |        |         |
| HD 26  | 65.9     |        |         | 1.98     |        |         | 1075      |        |         | 2140      |        |         | 33.3     |        |         | 55.5      |        |         |
| HD 27  | 73.9     |        |         | 3.21     |        |         | 577       |        |         | 1290      |        |         | 36.9     |        |         | 49.2      |        |         |
| HD 28  | 67.7     |        |         | 2.04     |        |         | 1100      |        |         | 1520      |        |         | 57.2     |        |         | 66.2      |        |         |
| HD 29  | 70.9     |        |         | 3.05     |        |         | 766       |        |         | 1160      |        |         | 54.1     |        |         | 51.1      |        |         |
| HD 30  | 79.7     |        |         | 2.24     |        |         | 610       |        |         | 2350      |        |         | 48.1     |        |         | 37.0      |        |         |

HD: healthy donor; I3A: indole-3-aldehyde; I3AA: indole-3-acetic acid; I3LA: indole-3-lactic acid; Kyn: L-kynurenine; KynA: kynurenic acid; OC: ovarian cancer patient; Pt.: patient; Trp: L-tryptophan.

Table S3. *Cont.*

|        | Phe (μM) |        |         | PP (nM) |        |         | Tyr (μM) |        |         | 4HPP (nM) |        |         | IL4I1 (ng/mL) |        |         |
|--------|----------|--------|---------|---------|--------|---------|----------|--------|---------|-----------|--------|---------|---------------|--------|---------|
|        | Plasma   | Plasma | Ascites | Plasma  | Plasma | Ascites | Plasma   | Plasma | Ascites | Plasma    | Plasma | Ascites | Plasma        | Plasma | Ascites |
|        | HD       | OC     | OC      | HD      | OC     | OC      | HD       | OC     | OC      | HD        | OC     | OC      | HD            | OC     | OC      |
| Pt. 1  |          | 77.0   |         |         | 133    |         |          | 78.1   |         |           | 445    |         |               | < 62.5 |         |
| Pt. 2  |          | 55.8   |         |         | 25.0   |         |          | 52.3   |         |           | 81.6   |         |               | 150    |         |
| Pt. 3  |          | 46.4   | 74.6    |         | 50.6   | 350     |          | 34.3   | 67.1    |           | 303    | 1165    |               | < 62.5 | 792     |
| Pt. 4  |          | 76.0   | 68.4    |         | 26.9   | 202     |          | 89.3   | 71.5    |           | 168    | 738     |               | 498    | 1745    |
| Pt. 5  |          | 83.7   | 147     |         | 92.8   | 360     |          | 64.6   | 127     |           | 298    | 1055    |               | < 62.5 | 579     |
| Pt. 6  |          | 72.8   | 114     |         | 78.8   | 776     |          | 65.9   | 131     |           | 240    | 1815    |               | < 62.5 | 2896    |
| Pt. 7  |          | 53.3   | 172     |         | 26.2   | 2435    |          | 54.8   | 158     |           | 110    | 3695    |               | 1812   | 7487    |
| Pt. 8  |          | 80.5   | 77.6    |         | 88.0   | 446     |          | 60.5   | 59.1    |           | 212    | 873     |               | < 62.5 | 1652    |
| Pt. 9  |          | 74.7   | 69.4    |         | 35.3   | 180     |          | 67.6   | 72.2    |           | 212    | 488     |               | < 62.5 | 112     |
| Pt. 10 |          | 57.0   | 66.2    |         | 30.0   | 249     |          | 40.4   | 46.7    |           | 90.6   | 686     |               | < 62.5 | 759     |
| Pt. 11 |          | 65.5   | 46.2    |         | 26.0   | 29.5    |          | 58.0   | 41.4    |           | 90.4   | 146     |               | < 62.5 | 156     |
| Pt. 12 |          | 76.2   | 82.6    |         | 56.8   | 135     |          | 61.4   | 63.9    |           | 128    | 529     |               | < 62.5 | 1560    |
| Pt. 13 |          | 69.8   | 63.4    |         | 26.8   | 349     |          | 57.2   | 56.9    |           | 85.9   | 573     |               | < 62.5 | 678     |
| Pt. 14 |          | 64.7   | 84.4    |         | 47.3   | 185     |          | 59.4   | 79.9    |           | 110    | 692     |               | < 62.5 | 730     |
| Pt. 15 |          | 93.5   | 72.8    |         | 222    | 1035    |          | 77.7   | 58.5    |           | 355    | 1255    |               | < 62.5 | 1189    |
| Pt. 16 |          | 50.1   | 70.2    |         | 47.6   | 393     |          | 39.0   | 52.9    |           | 114    | 794     |               | < 62.5 | 1489    |
| Pt. 17 |          | 47.4   | 55.3    |         | 19.1   | 126     |          | 48.8   | 55.9    |           | 84.4   | 345     |               | < 62.5 | 251     |
| Pt. 18 |          | 75.4   | 74.8    |         | 171    | 6255    |          | 88.7   | 76.5    |           | 424    | 13100   |               | 1364   | 4995    |
| Pt. 19 |          | 69.4   | 119     |         | 120    | 987     |          | 65.1   | 110     |           | 313    | 1635    |               | < 62.5 | 2836    |
| Pt. 20 |          | 62.9   | 84.0    |         | 38.3   | 821     |          | 46.9   | 69.5    |           | 89.0   | 784     |               | < 62.5 | 2578    |
| Pt. 21 |          | 73.3   | 70.9    |         | 27.3   | 163     |          | 55.1   | 59.4    |           | 94.9   | 631     |               | < 62.5 | 499     |
| Pt. 22 |          | 92.5   | 105     |         | 33.6   | 782     |          | 72.6   | 83.3    |           | 127    | 905     |               | < 62.5 | 647     |
| Pt. 23 |          | 75.5   | 64.2    |         | 41.5   | 50.9    |          | 55.2   | 66.0    |           | 92.8   | 413     |               | < 62.5 | 2100    |
| Pt. 24 |          | 51.7   | 58.2    |         | 20.8   | 843     |          | 54.8   | 64.6    |           | 107    | 1355    |               | < 62.5 | 3172    |
| Pt. 25 |          |        | 196     |         |        | 944     |          |        | 159     |           |        | 978     |               |        | 848     |
| Pt. 26 |          |        | 87.1    |         |        | 325     |          |        | 82.3    |           |        | 1095    |               |        | 919     |
| Pt. 27 |          |        | 98.6    |         |        | 595     |          |        | 105     |           |        | 1065    |               |        | 1601    |
| Pt. 28 |          |        | 126     |         |        | 900     |          |        | 112     |           |        | 1115    |               |        | 148     |
| Pt. 29 |          |        | 93.9    |         |        | 311     |          |        | 82.6    |           |        | 528     |               |        | 4103    |
| Pt. 30 |          |        | 129     |         |        | 4560    |          |        | 104     |           |        | 3945    |               |        | 1315    |
| Pt. 31 |          |        | 81.9    |         |        | 327     |          |        | 78.8    |           |        | 771     |               |        | 540     |
| Pt. 32 |          |        | 81.5    |         |        | 340     |          |        | 75.8    |           |        | 871     |               |        | 855     |
| Pt. 33 |          |        | 111     |         |        | 783     |          |        | 123     |           |        | 2285    |               |        | 1378    |
| Pt. 34 |          |        | 92.7    |         |        | 64.8    |          |        | 95.2    |           |        | 509     |               |        | 892     |
| HD 1   | 76.6     |        |         | 249     |        |         | 60.4     |        |         | 349       |        |         | < 62.5        |        |         |
| HD 2   | 66.3     |        |         | 101     |        |         | 58.7     |        |         | 274       |        |         | < 62.5        |        |         |
| HD 3   | 76.3     |        |         | 111     |        |         | 57.3     |        |         | 250       |        |         | < 62.5        |        |         |
| HD 4   | 68.0     |        |         | 121     |        |         | 67.4     |        |         | 262       |        |         | 1514          |        |         |
| HD 5   | 81.8     |        |         | 192     |        |         | 120      |        |         | 953       |        |         | < 62.5        |        |         |
| HD 6   | 68.3     |        |         | 103     |        |         | 63.5     |        |         | 310       |        |         | 697           |        |         |
| HD 7   | 87.9     |        |         | 128     |        |         | 91.4     |        |         | 152       |        |         | < 62.5        |        |         |
| HD 8   | 64.6     |        |         | 104     |        |         | 91.6     |        |         | 360       |        |         | < 62.5        |        |         |
| HD 9   | 79.9     |        |         | 154     |        |         | 81.2     |        |         | 361       |        |         | < 62.5        |        |         |
| HD 10  | 46.5     |        |         | 116     |        |         | 51.4     |        |         | 358       |        |         | < 62.5        |        |         |
| HD 11  | 42.2     |        |         | 101     |        |         | 35.3     |        |         | 422       |        |         | < 62.5        |        |         |
| HD 12  | 66.8     |        |         | 134     |        |         | 83.6     |        |         | 491       |        |         | < 62.5        |        |         |
| HD 13  | 67.0     |        |         | 125     |        |         | 55.6     |        |         | 269       |        |         | < 62.5        |        |         |
| HD 14  | 47.6     |        |         | 82.6    |        |         | 51.3     |        |         | 258       |        |         | < 62.5        |        |         |
| HD 15  | 69.7     |        |         | 82.5    |        |         | 93.9     |        |         | 395       |        |         | 126           |        |         |
| HD 16  | 76.4     |        |         | 150     |        |         | 93.4     |        |         | 645       |        |         | < 62.5        |        |         |
| HD 17  | 72.1     |        |         | 167     |        |         | 69.8     |        |         | 423       |        |         | < 62.5        |        |         |
| HD 18  | 90.2     |        |         | 251     |        |         | 109      |        |         | 654       |        |         | < 62.5        |        |         |
| HD 19  | 88.7     |        |         | 146     |        |         | 82.1     |        |         | 443       |        |         | < 62.5        |        |         |
| HD 20  | 69.0     |        |         | 102     |        |         | 77.5     |        |         | 465       |        |         | 497           |        |         |
| HD 21  | 72.1     |        |         | 144     |        |         | 92.1     |        |         | 787       |        |         | < 62.5        |        |         |
| HD 22  | 68.8     |        |         | 131     |        |         | 87.4     |        |         | 454       |        |         | < 62.5        |        |         |
| HD 23  | 81.8     |        |         | 147     |        |         | 86.8     |        |         | 446       |        |         | < 62.5        |        |         |
| HD 24  | 78.8     |        |         | 177     |        |         | 86.6     |        |         | 589       |        |         | < 62.5        |        |         |
| HD 25  | 69.6     |        |         | 104     |        |         | 62.4     |        |         | 314       |        |         | < 62.5        |        |         |
| HD 26  | 68.0     |        |         | 106     |        |         | 82.2     |        |         | 413       |        |         | < 62.5        |        |         |
| HD 27  | 115      |        |         | 147     |        |         | 142      |        |         | 564       |        |         | < 62.5        |        |         |
| HD 28  | 62.0     |        |         | 144     |        |         | 71.0     |        |         | 470       |        |         | < 62.5        |        |         |
| HD 29  | 79.1     |        |         | 174     |        |         | 111      |        |         | 899       |        |         | < 62.5        |        |         |
| HD 30  | 97.3     |        |         | 154     |        |         | 142      |        |         | 617       |        |         | < 62.5        |        |         |

4HPP: 4-hydroxyphenylpyruvic acid; HD: healthy donor; IL4I1: interleukin 4 induced 1; OC: ovarian cancer patient; Phe: L-phenylalanine; PP: phenylpyruvic acid; Pt.: patient; Tyr: L-tyrosine.

**Table S4.** IL4I1 metabolite and enzyme concentrations in pleural effusion samples from non-small cell lung cancer patients. PP and 4HPP concentrations were determined by LC-MS/MS analysis. IL4I1 concentrations were determined by ELISA.

|        | <b>PP<br/>(nM)</b> | <b>4HPP<br/>(nM)</b> | <b>IL4I1<br/>(ng/mL)</b> |
|--------|--------------------|----------------------|--------------------------|
| Pt. 1  | 1200               | 3005                 | 4070                     |
| Pt. 2  | 367                | 174                  | 2539                     |
| Pt. 3  | 368                | 1490                 | 4035                     |
| Pt. 4  | 12.1               | 87.5                 | 234                      |
| Pt. 5  | 279                | 228                  | 1018                     |
| Pt. 6  | 33.5               | 74.7                 | 62.0                     |
| Pt. 7  | 1030               | 428                  | 868                      |
| Pt. 8  | 91.9               | 118                  | 62.0                     |
| Pt. 9  | 354                | 508                  | 1307                     |
| Pt. 10 | 80.0               | 208                  | 3254                     |
| Pt. 11 | 391                | 223                  | 341                      |
| Pt. 12 | 273                | 125                  | 691                      |
| Pt. 13 | 25.2               | 108                  | 525                      |
| Pt. 14 | 460                | 368                  | 672                      |
| Pt. 15 | 251                | 329                  | 589                      |
| Pt. 16 | 1480               | 482                  | 643                      |
| Pt. 17 | 223                | 130                  | 62.0                     |
| Pt. 18 | 531                | 100                  | 115                      |
| Pt. 19 | 202                | 62.5                 | 489                      |
| Pt. 20 | 509                | 290                  | 62.0                     |
| Pt. 21 | 413                | 153                  | 1968                     |
| Pt. 22 | 2990               | 1850                 | 2459                     |
| Pt. 23 | 595                | 231                  | 630                      |
| Pt. 24 | 1885               | 840                  | 883                      |

4HPP: 4-hydroxyphenylpyruvic acid; IL4I1: interleukin 4 induced 1; PP: phenylpyruvic acid.

**Table S5.** Clinicopathological characteristics and details on the treatment of included high-grade serous ovarian cancer patients who completed primary treatment and subgroups thereof.

|                             | All Patients<br>with Completed<br>Treatment ( <i>n</i> = 26) | Subgroups Based on Collected Samples *                |                                                        |                                                                          |
|-----------------------------|--------------------------------------------------------------|-------------------------------------------------------|--------------------------------------------------------|--------------------------------------------------------------------------|
|                             |                                                              | Patients with<br>Plasma Collected<br>( <i>n</i> = 20) | Patients with<br>Ascites Collected<br>( <i>n</i> = 24) | Patients with Both<br>Plasma and Ascites<br>Collected ( <i>n</i> = 18) † |
| Age (years)                 |                                                              |                                                       |                                                        |                                                                          |
| Median (IQR)                | 60.5 (57–67)                                                 | 60 (54–64)                                            | 61.5 (58–67)                                           | 61 (57–65)                                                               |
| BMI (kg/m <sup>2</sup> )    |                                                              |                                                       |                                                        |                                                                          |
| Median (IQR)                | 26 (22–28)                                                   | 24 (22–27)                                            | 26 (22–29)                                             | 24 (22–27)                                                               |
| FIGO stage                  |                                                              |                                                       |                                                        |                                                                          |
| II                          | 2 (7.7%)                                                     | 1 (5.0%)                                              | 2 (8.3%)                                               | 1 (5.6%)                                                                 |
| III                         | 17 (65.4%)                                                   | 13 (65.0%)                                            | 15 (62.5%)                                             | 11 (61.1%)                                                               |
| IV                          | 7 (26.9%)                                                    | 6 (30.0%)                                             | 7 (29.2%)                                              | 6 (33.3%)                                                                |
| Surgery                     |                                                              |                                                       |                                                        |                                                                          |
| PDS                         | 11 (42.3%)                                                   | 10 (50.0%)                                            | 10 (41.7%)                                             | 9 (50.0%)                                                                |
| IDS                         | 11 (42.3%)                                                   | 7 (35.0%)                                             | 10 (41.7%)                                             | 6 (33.3%)                                                                |
| IDS/HIPEC                   | 4 (15.4%)                                                    | 3 (15.0%)                                             | 4 (16.7%)                                              | 3 (16.7%)                                                                |
| Outcome surgery             |                                                              |                                                       |                                                        |                                                                          |
| Optimal                     | 8 (30.8%)                                                    | 7 (35.0%)                                             | 8 (33.3%)                                              | 7 (38.9%)                                                                |
| Complete                    | 18 (69.2%)                                                   | 13 (65.0%)                                            | 16 (66.7%)                                             | 11 (61.1%)                                                               |
| Chemotherapy                |                                                              |                                                       |                                                        |                                                                          |
| Carboplatin +<br>paclitaxel | 24 (92.3%)                                                   | 19 (95.0%)                                            | 22 (91.7%)                                             | 17 (94.4%)                                                               |
| Other regimen               | 2 (7.7%)                                                     | 1 (5.0%)                                              | 2 (8.3%)                                               | 1 (5.6%)                                                                 |
| Platinum sensitive ‡        |                                                              |                                                       |                                                        |                                                                          |
| Yes                         | 22 (84.6%)                                                   | 16 (80.0%)                                            | 20 (83.3%)                                             | 14 (77.8%)                                                               |
| No                          | 4 (15.4%)                                                    | 4 (20.0%)                                             | 4 (16.7%)                                              | 4 (22.2%)                                                                |

BMI: body mass index; FIGO: International Federation of Gynecology and Obstetrics; IDS: interval debulking surgery; IDS/HIPEC: interval debulking surgery in combination with hyperthermic intraperitoneal chemotherapy; IQR: interquartile range; PDS: primary debulking surgery. Percentages may not total to 100% due to rounding. \* Samples from remaining patients were missing for logistic reasons. † Also referred to as “overlapping patients”. ‡ Platinum sensitivity is defined as a progression-free survival greater than six months.

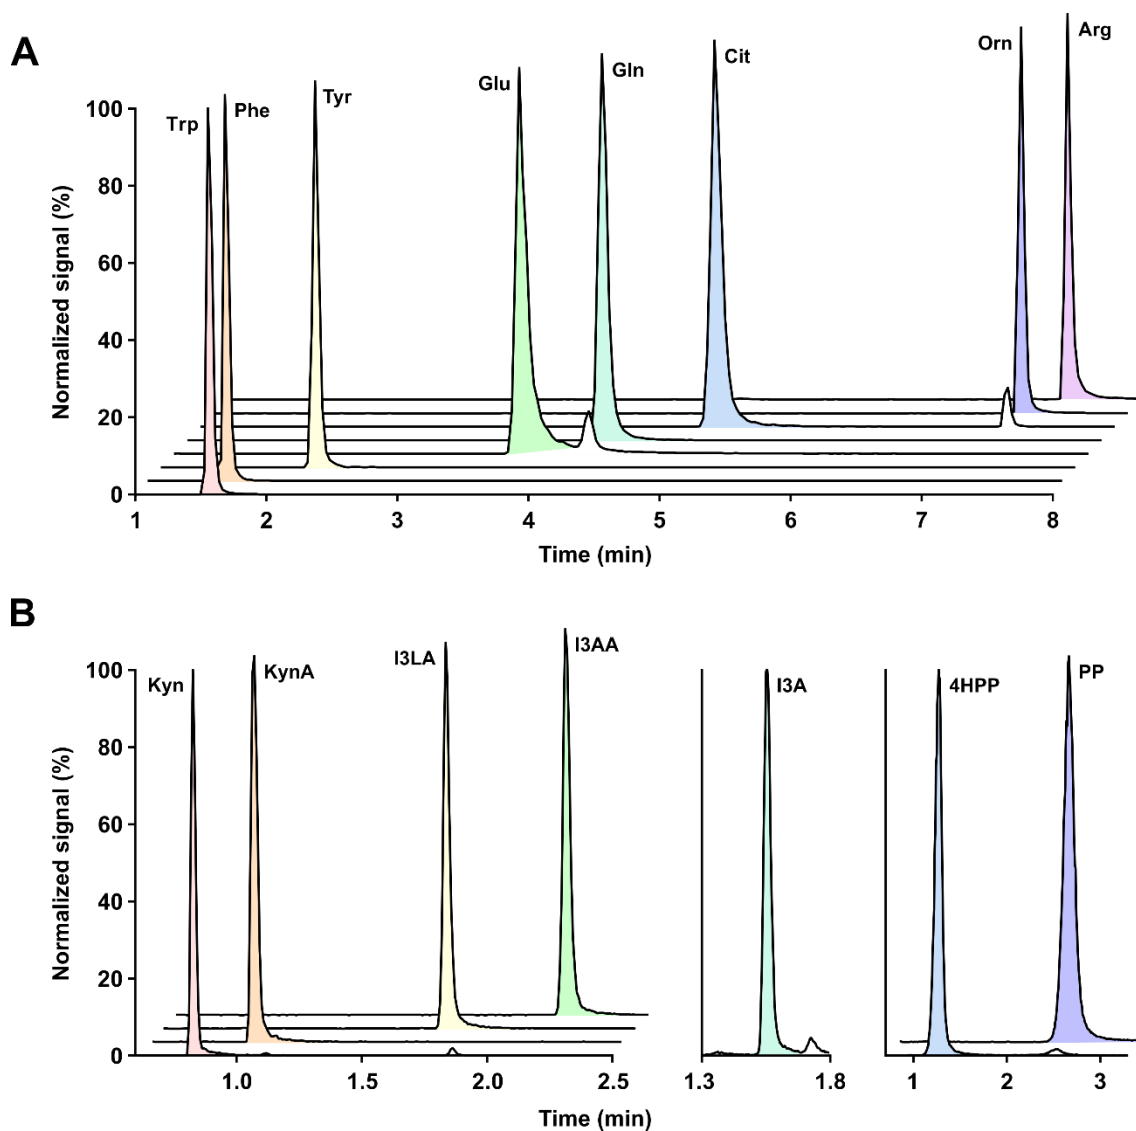

**Figure S1.** Representative chromatograms for analyte separation in surrogate matrices by (A) hydrophilic interaction liquid chromatography (HILIC)- and (B) reversed-phase liquid chromatography (RPLC)-tandem mass spectrometry (MS/MS). 4HPP: 4-hydroxyphenylpyruvic acid; Arg: L-arginine; Cit: L-citrulline; Gln: L-glutamine; Glu: L-glutamic acid; I3A: indole-3-aldehyde; I3AA: indole-3-acetic acid; I3LA: indole-3-lactic acid; Kyn: L-kynurenine; KynA: kynurenic acid; Orn: L-ornithine; Phe: phenylalanine; PP: phenylpyruvic acid; Trp: L-tryptophan; Tyr: L-tyrosine.



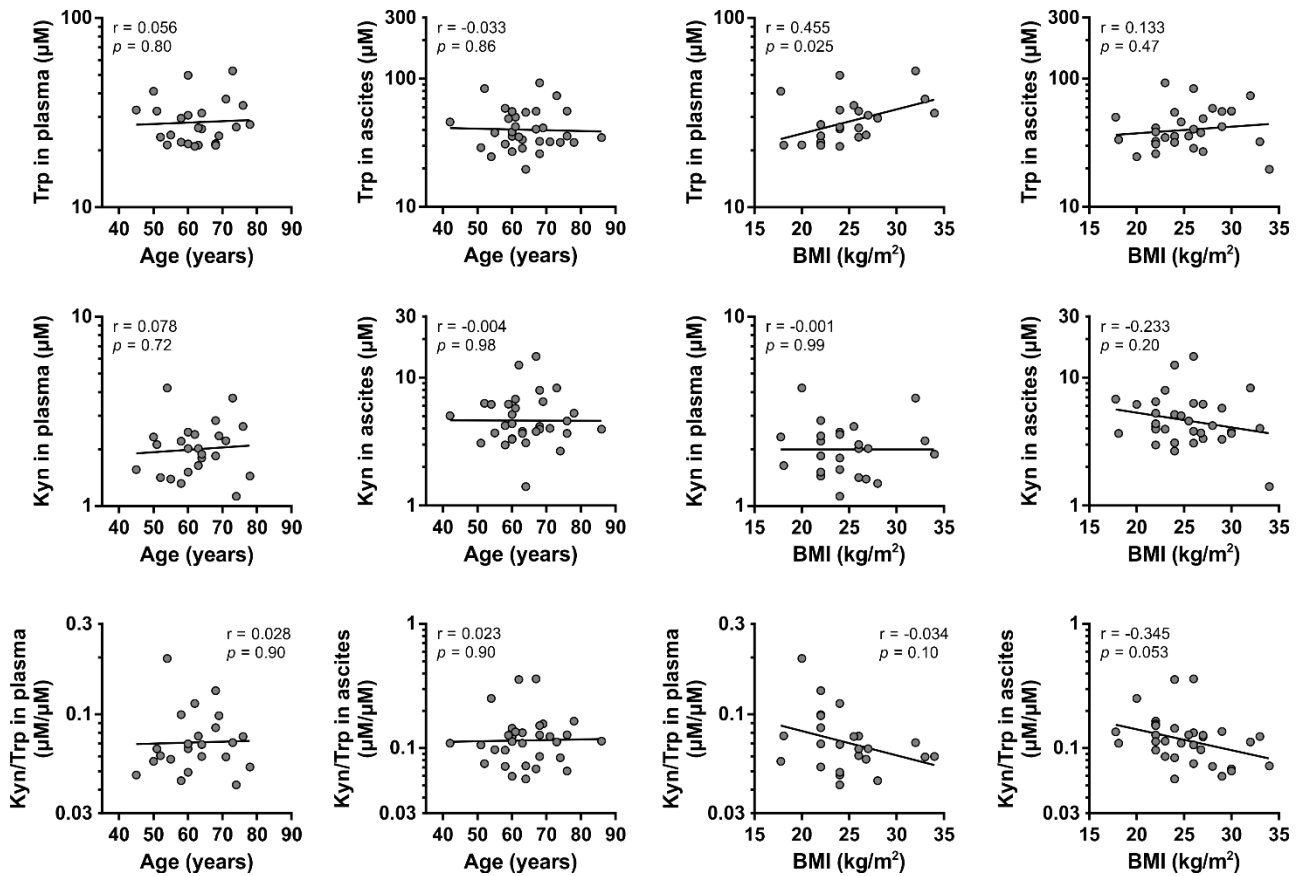

**Figure S2.** Correlation between Trp levels, Kyn levels or Kyn/Trp ratios in plasma ( $n = 24$ ) or ascites ( $n = 32$ ) and age or BMI of high-grade serous ovarian cancer patients. Results of Pearson's correlation analyses are indicated in the graphs. BMI: body mass index; Kyn: kynurenine; r: Pearson's correlation coefficient; Trp: tryptophan.

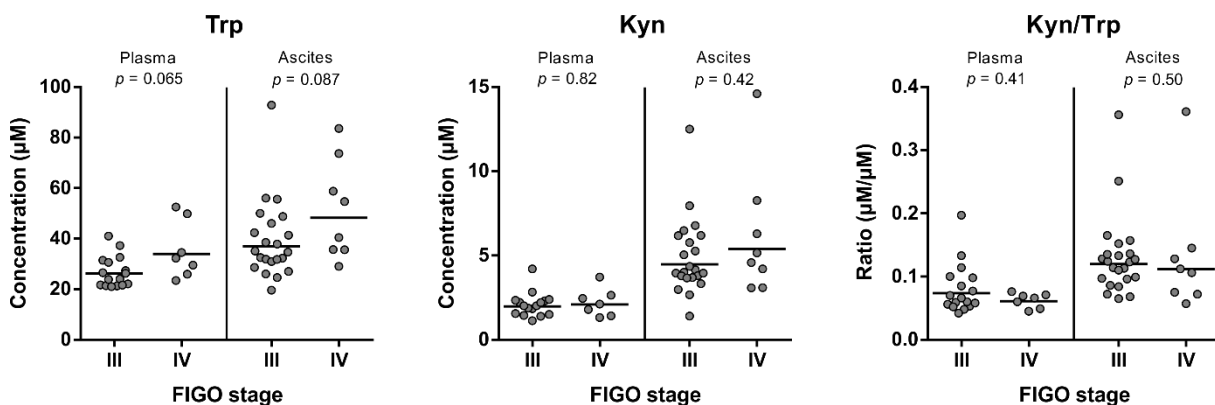

**Figure S3.** Comparison of Trp levels, Kyn levels and Kyn/Trp ratios in high-grade serous ovarian cancer patients with stage III ( $n = 16$  for plasma;  $n = 22$  for ascites) and stage IV disease ( $n = 7$  for plasma;  $n = 8$  for ascites). Horizontal lines indicate geometric means. Results of unpaired, two-tailed Mann-Whitney U tests are indicated in the graphs. Since only two patients with stage II disease were included in the study, these patients were excluded from this analysis. FIGO: International Federation of Gynecology and Obstetrics; Kyn: L-kynurenine; Trp: L-tryptophan.

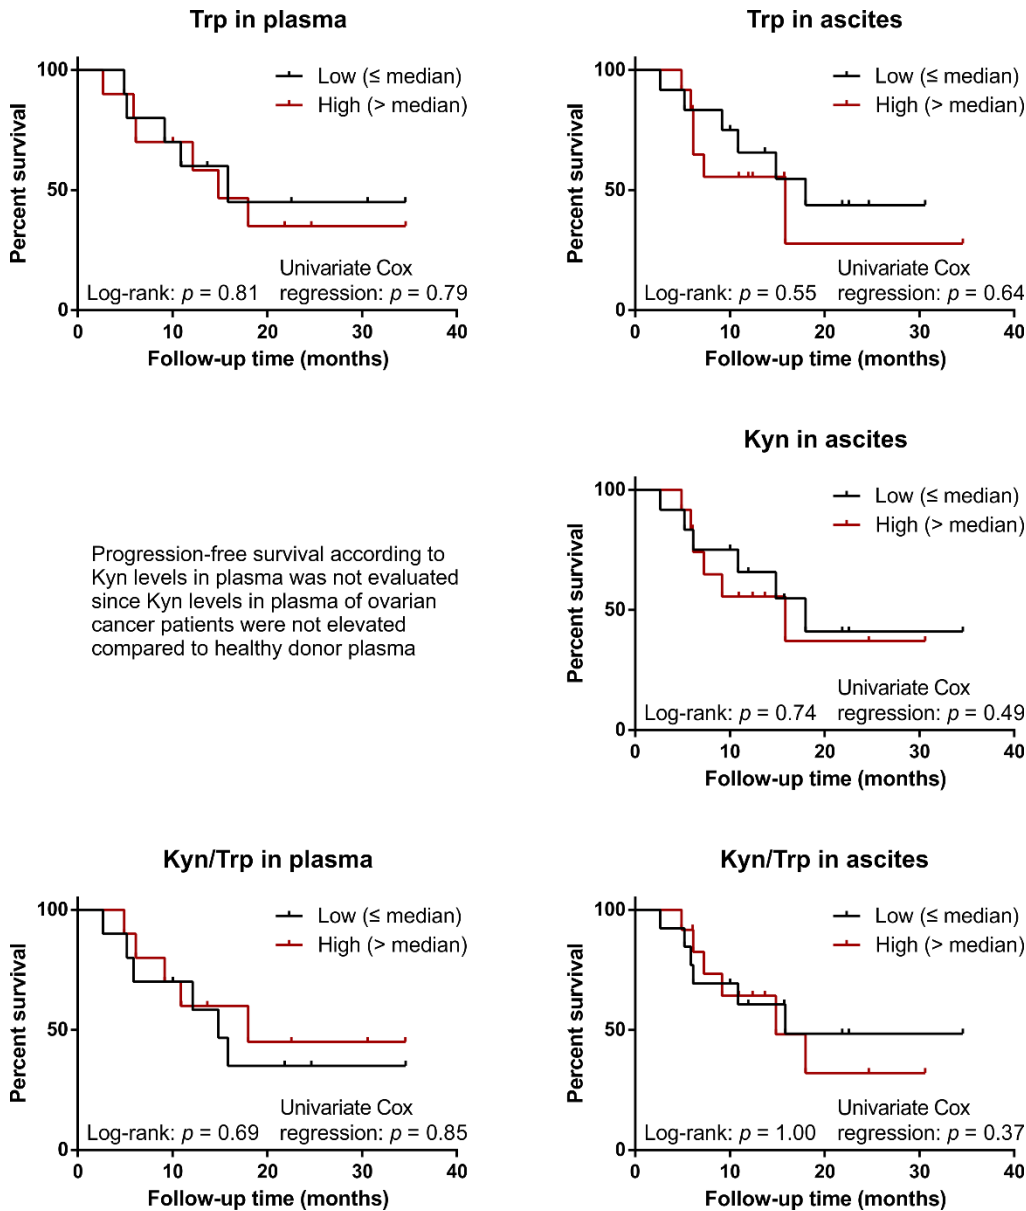

**Figure S4.** Kaplan–Meier progression-free survival curves according to Trp levels, Kyn levels and Kyn/Trp ratios in plasma or ascites of high-grade serous ovarian cancer patients who completed treatment ( $n = 20$  for plasma;  $n = 24$  for ascites). Results of log-rank and univariate Cox regression analyses are indicated in the graphs. Multivariate regression analysis was not performed due to small sample sizes. Kyn: L-kynurenine; Trp: L-tryptophan.

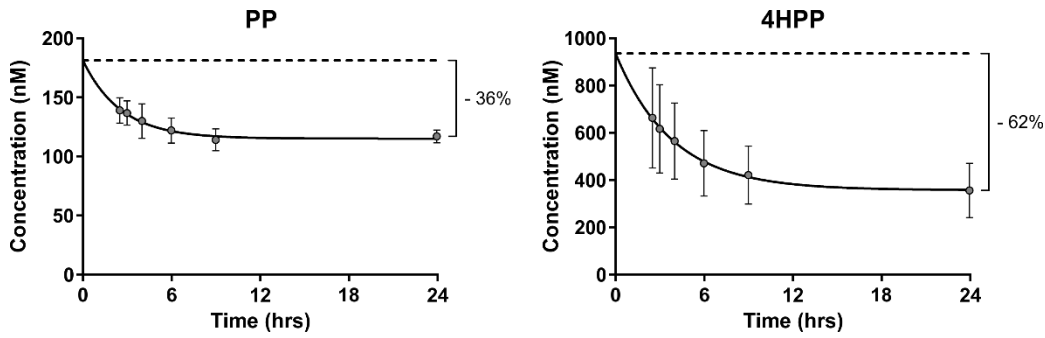

**Figure S5.** Estimation of the reduction in PP and 4HPP levels in healthy donor blood stored at room temperature prior to plasma separation. Data have been fitted with an exponential one-phase decay curve to estimate the reduction in PP and 4HPP levels between the time of blood collection ( $t = 0$  hours) and the approximated time at which the ovarian cancer patient plasma samples were processed ( $t = 24$  hours). 4HPP: 4-hydroxyphenylpyruvic acid; PP: phenylpyruvic acid.

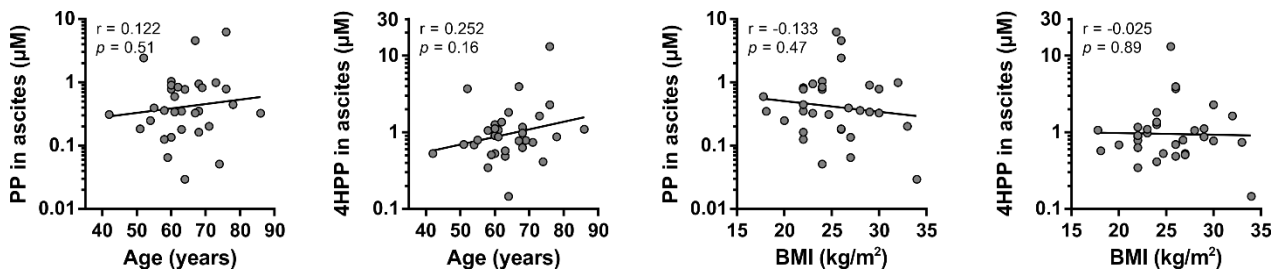

**Figure S6.** Correlation between PP or 4HPP levels in ascites and age or BMI of high-grade serous ovarian cancer patients ( $n = 32$ ). Results of Pearson's correlation analyses are indicated in the graphs. BMI: body mass index; 4HPP: 4-hydroxyphenylpyruvic acid; PP: phenylpyruvic acid;  $r$ : Pearson's correlation coefficient.

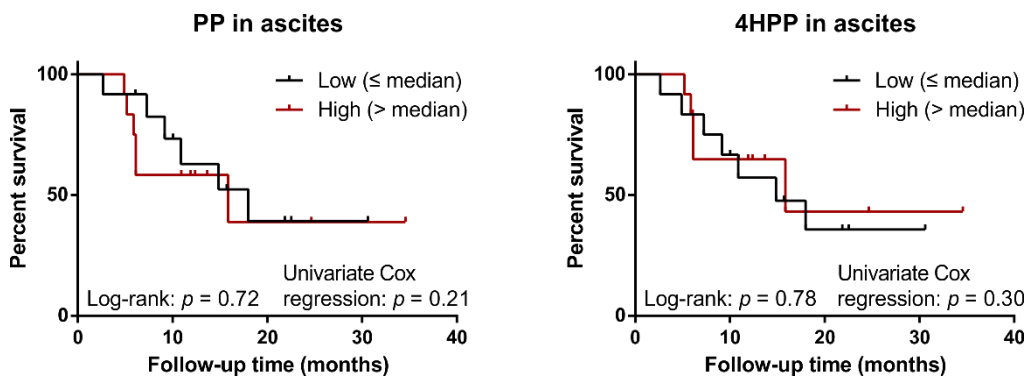

**Figure S7.** Kaplan–Meier progression-free survival curves according to PP and 4HPP levels in ascites of high-grade serous ovarian cancer patients who completed treatment ( $n = 24$ ). Results of log-rank and univariate Cox regression analyses are indicated in the graphs. Multivariate regression analysis was not performed due to small sample sizes. 4HPP: 4-hydroxyphenylpyruvic acid; PP: phenylpyruvic acid.
